# Supplementary material for: Future of Artificial Intelligence Applications in Cancer Care: A Global Cross-Sectional Survey of Researchers
Source: MDPI journal article supplement (doi:10.3390/curroncol30030260), 2023-03-16
Supplement: s1 [file s1]

## Supplementary Material – Statistical Analysis (Knowledge level)

Please indicate your knowledge level on artificial intelligence in cancer care

|                               |                       |                       |                       |              |
|-------------------------------|-----------------------|-----------------------|-----------------------|--------------|
| <b>Sample size</b>            |                       | 942                   |                       |              |
| <b>Margin of error</b>        |                       | 3.20%                 |                       |              |
| <b>Mean</b>                   |                       | 2.02                  |                       |              |
| <b>Standard deviation</b>     |                       | 0.746                 |                       |              |
| <b>Percentiles</b>            | $\frac{1}{4}$         | 1 (High knowledge)    |                       |              |
|                               | $\frac{1}{2}$         | 2 (Good knowledge)    |                       |              |
|                               | $\frac{3}{4}$         | 3 (Some knowledge)    |                       |              |
| <b>Kolmogorov-Smirnov</b>     |                       | <b>Test ratio</b>     | <b>P-value</b>        |              |
|                               |                       | 0.223                 | 0.000                 |              |
| <b>Shapiro-Wilk</b>           |                       | <b>Test ratio</b>     | <b>P-value</b>        |              |
|                               |                       | 0.809                 | 0.000                 |              |
|                               | <b>Some knowledge</b> | <b>Good knowledge</b> | <b>High knowledge</b> | <b>Total</b> |
| <b>Number of observations</b> | 272                   | 418                   | 252                   | 942          |
| <b>Frequency</b>              | 28.87%                | 44.37%                | 26.75%                | 100%         |

Artificial intelligence will be widely used in cancer care

|                           |               |                            |                |
|---------------------------|---------------|----------------------------|----------------|
| <b>Sample size</b>        |               | 937                        |                |
| <b>Margin of error</b>    |               | 3.21%                      |                |
| <b>Mean</b>               |               | 1.35                       |                |
| <b>Standard deviation</b> |               | 0.509                      |                |
| <b>Percentiles</b>        | $\frac{1}{4}$ | 1 (Likely before 10 years) |                |
|                           | $\frac{1}{2}$ | 1 (Likely before 10 years) |                |
|                           | $\frac{3}{4}$ | 2 (Likely after 10 years)  |                |
| <b>Kruskal-Wallis</b>     |               | <b>Statistic</b>           | <b>P-value</b> |
|                           |               | 1.592                      | 0.451          |
| <b>Kolmogorov-Smirnov</b> |               | <b>Statistic</b>           | <b>P-value</b> |
|                           |               | 0.418                      | 0.000          |
| <b>Shapiro-Wilk</b>       |               | <b>Statistic</b>           | <b>P-value</b> |
|                           |               | 0.630                      | 0.000          |

|                       |                               | <b>Unlikely</b> | <b>Likely after 10 years</b> | <b>Likely before 10 years</b> | <b>Total</b> |
|-----------------------|-------------------------------|-----------------|------------------------------|-------------------------------|--------------|
| <b>Some knowledge</b> | <b>Number of observations</b> | 1               | 93                           | 175                           | 269          |
|                       | <b>Frequency</b>              | 0.37%           | 34.57%                       | 65.06%                        | 100.00%      |
| <b>Good knowledge</b> | <b>Number of observations</b> | 7               | 140                          | 270                           | 417          |
|                       | <b>Frequency</b>              | 1.68%           | 33.57%                       | 64.75%                        | 100.00%      |
| <b>High Knowledge</b> | <b>Number of observations</b> | 6               | 70                           | 175                           | 251          |
|                       | <b>Frequency</b>              | 2.39%           | 27.89%                       | 69.72%                        | 100.00%      |

### Artificial intelligence will provide more reliable diagnostics

|                    |               |                            |         |
|--------------------|---------------|----------------------------|---------|
| Sample size        |               | 938                        |         |
| Margin of error    |               | 3.21%                      |         |
| Mean               |               | 1.33                       |         |
| Standard deviation |               | 0.516                      |         |
| Percentiles        | $\frac{1}{4}$ | 1 (Likely before 10 years) |         |
|                    | $\frac{1}{2}$ | 1 (Likely before 10 years) |         |
|                    | $\frac{3}{4}$ | 2 (Likely after 10 years)  |         |
| Kruskal-Wallis     |               | Statistic                  | P-value |
|                    |               | 1.729                      | 0.421   |
| Kolmogorov-Smirnov |               | Statistic                  | P-value |
|                    |               | 0.430                      | 0.000   |
| Shapiro-Wilk       |               | Statistic                  | P-value |
|                    |               | 0.618                      | 0.000   |

|                |                        | Unlikely | Likely after 10 years | Likely before 10 years | Total   |
|----------------|------------------------|----------|-----------------------|------------------------|---------|
| Some knowledge | Number of observations | 6        | 80                    | 184                    | 270     |
|                | Frequency              | 2.22%    | 29.63%                | 68.15%                 | 100.00% |
| Good knowledge | Number of observations | 12       | 122                   | 283                    | 417     |
|                | Frequency              | 2.88%    | 29.26%                | 67.87%                 | 100.00% |
| High Knowledge | Number of observations | 3        | 67                    | 181                    | 251     |
|                | Frequency              | 1.20%    | 26.69%                | 72.11%                 | 100.00% |

### Artificial intelligence will reduce screening cost

|                    |               |                            |         |
|--------------------|---------------|----------------------------|---------|
| Sample size        |               | 932                        |         |
| Margin of error    |               | 3.21%                      |         |
| Mean               |               | 1.39                       |         |
| Standard deviation |               | 0.599                      |         |
| Percentiles        | $\frac{1}{4}$ | 1 (Likely before 10 years) |         |
|                    | $\frac{1}{2}$ | 1 (Likely before 10 years) |         |
|                    | $\frac{3}{4}$ | 2 (Likely after 10 years)  |         |
| Kruskal-Wallis     |               | Statistic                  | P-value |
|                    |               | 2.721                      | 0.257   |
| Kolmogorov-Smirnov |               | Statistic                  | P-value |
|                    |               | 0.413                      | 0.000   |
| Shapiro-Wilk       |               | Statistic                  | P-value |
|                    |               | 0.647                      | 0.000   |

|                |                        | Unlikely | Likely after 10 years | Likely before 10 years | Total   |
|----------------|------------------------|----------|-----------------------|------------------------|---------|
| Some knowledge | Number of observations | 12       | 68                    | 189                    | 269     |
|                | Frequency              | 4.46%    | 25.28%                | 70.26%                 | 100.00% |
| Good knowledge | Number of observations | 25       | 122                   | 265                    | 412     |
|                | Frequency              | 6.07%    | 29.61%                | 64.32%                 | 100.00% |

|                       |                               |       |        |        |         |
|-----------------------|-------------------------------|-------|--------|--------|---------|
| <b>High Knowledge</b> | <b>Number of observations</b> | 19    | 61     | 171    | 251     |
|                       | <b>Frequency</b>              | 7.57% | 24.30% | 68.13% | 100.00% |

#### Artificial intelligence will improve follow-up services

|                    |   |                            |         |
|--------------------|---|----------------------------|---------|
| Sample size        |   | 928                        |         |
| Margin of error    |   | 3.22%                      |         |
| Mean               |   | 1.34                       |         |
| Standard deviation |   | 0.524                      |         |
| Percentiles        | ¼ | 1 (Likely before 10 years) |         |
|                    | ½ | 1 (Likely before 10 years) |         |
|                    | ¾ | 2 (Likely after 10 years)  |         |
| Kruskal-Wallis     |   | Statistic                  | P-value |
|                    |   | 3.718                      | 0.156   |
| Kolmogorov-Smirnov |   | Statistic                  | P-value |
|                    |   | 0.426                      | 0.000   |
| Shapiro-Wilk       |   | Statistic                  | P-value |
|                    |   | 0.624                      | 0.000   |

|                       |                               | <b>Unlikely</b> | <b>Likely after 10 years</b> | <b>Likely before 10 years</b> | <b>Total</b> |
|-----------------------|-------------------------------|-----------------|------------------------------|-------------------------------|--------------|
| <b>Some knowledge</b> | <b>Number of observations</b> | 4               | 79                           | 185                           | 268          |
|                       | <b>Frequency</b>              | 1.49%           | 29.48%                       | 69.03%                        | 100.00%      |
| <b>Good knowledge</b> | <b>Number of observations</b> | 14              | 128                          | 271                           | 413          |
|                       | <b>Frequency</b>              | 3.39%           | 30.99%                       | 65.62%                        | 100.00%      |
| <b>High Knowledge</b> | <b>Number of observations</b> | 5               | 63                           | 179                           | 247          |
|                       | <b>Frequency</b>              | 2.02%           | 25.51%                       | 72.47%                        | 100.00%      |

#### Artificial intelligence will aid the discovery of new drugs

|                           |   |                            |                |
|---------------------------|---|----------------------------|----------------|
| <b>Sample size</b>        |   | 930                        |                |
| <b>Margin of error</b>    |   | 3.22%                      |                |
| <b>Mean</b>               |   | 1.52                       |                |
| <b>Standard deviation</b> |   | 0.621                      |                |
| <b>Percentiles</b>        | ¼ | 1 (Likely before 10 years) |                |
|                           | ½ | 1 (Likely before 10 years) |                |
|                           | ¾ | 2 (Likely after 10 years)  |                |
| <b>Kruskal-Wallis</b>     |   | <b>Statistic</b>           | <b>P-value</b> |
|                           |   | 5.386                      | 0.068          |
| <b>Kolmogorov-Smirnov</b> |   | <b>Statistic</b>           | <b>P-value</b> |
|                           |   | 0.349                      | 0.000          |
| <b>Shapiro-Wilk</b>       |   | <b>Statistic</b>           | <b>P-value</b> |
|                           |   | 0.719                      | 0.000          |

|                       |                               | <b>Unlikely</b> | <b>Likely after 10 years</b> | <b>Likely before 10 years</b> | <b>Total</b> |
|-----------------------|-------------------------------|-----------------|------------------------------|-------------------------------|--------------|
| <b>Some knowledge</b> | <b>Number of observations</b> | 22              | 110                          | 136                           | 268          |
|                       | <b>Frequency</b>              | 8.21%           | 41.04%                       | 50.75%                        | 100.00%      |

|                       |                               |       |        |        |         |
|-----------------------|-------------------------------|-------|--------|--------|---------|
| <b>Good knowledge</b> | <b>Number of observations</b> | 24    | 163    | 225    | 412     |
|                       | <b>Frequency</b>              | 5.83% | 39.56% | 54.61% | 100.00% |
| <b>High Knowledge</b> | <b>Number of observations</b> | 17    | 80     | 153    | 268     |
|                       | <b>Frequency</b>              | 6.34% | 29.85% | 57.09% | 100.00% |

#### Artificial intelligence will grade and classify cancer

|                           |               |                            |                |
|---------------------------|---------------|----------------------------|----------------|
| <b>Sample size</b>        |               | 934                        |                |
| <b>Margin of error</b>    |               | 3.21%                      |                |
| <b>Mean</b>               |               | 1.29                       |                |
| <b>Standard deviation</b> |               | 0.497                      |                |
| <b>Percentiles</b>        | $\frac{1}{4}$ | 1 (Likely before 10 years) |                |
|                           | $\frac{1}{2}$ | 1 (Likely before 10 years) |                |
|                           | $\frac{3}{4}$ | 2 (Likely after 10 years)  |                |
| <b>Kruskal-Wallis</b>     |               | <b>Statistic</b>           | <b>P-value</b> |
|                           |               | 4.301                      | 0.116          |
| <b>Kolmogorov-Smirnov</b> |               | <b>Statistic</b>           | <b>P-value</b> |
|                           |               | 0.451                      | 0.000          |
| <b>Shapiro-Wilk</b>       |               | <b>Statistic</b>           | <b>P-value</b> |
|                           |               | 0.583                      | 0.000          |

|                       |                               |                 |                              |                               |              |
|-----------------------|-------------------------------|-----------------|------------------------------|-------------------------------|--------------|
|                       |                               | <b>Unlikely</b> | <b>Likely after 10 years</b> | <b>Likely before 10 years</b> | <b>Total</b> |
| <b>Some knowledge</b> | <b>Number of observations</b> | 4               | 73                           | 191                           | 268          |
|                       | <b>Frequency</b>              | 1.49%           | 27.24%                       | 71.27%                        | 100.00%      |
| <b>Good knowledge</b> | <b>Number of observations</b> | 11              | 108                          | 296                           | 415          |
|                       | <b>Frequency</b>              | 2.65%           | 26.02%                       | 71.33%                        | 100.00%      |
| <b>High Knowledge</b> | <b>Number of observations</b> | 4               | 51                           | 196                           | 251          |
|                       | <b>Frequency</b>              | 1.59%           | 20.32%                       | 78.09%                        | 100.00%      |

#### Artificial intelligence will improve prognostics

|                           |               |                            |                |
|---------------------------|---------------|----------------------------|----------------|
| <b>Sample size</b>        |               | 934                        |                |
| <b>Margin of error</b>    |               | 3.21%                      |                |
| <b>Mean</b>               |               | 1.37                       |                |
| <b>Standard deviation</b> |               | 0.564                      |                |
| <b>Percentiles</b>        | $\frac{1}{4}$ | 1 (Likely before 10 years) |                |
|                           | $\frac{1}{2}$ | 1 (Likely before 10 years) |                |
|                           | $\frac{3}{4}$ | 2 (Likely after 10 years)  |                |
| <b>Kruskal-Wallis</b>     |               | <b>Statistic</b>           | <b>P-value</b> |
|                           |               | 3.758                      | 0.153          |
| <b>Kolmogorov-Smirnov</b> |               | <b>Statistic</b>           | <b>P-value</b> |
|                           |               | 0.414                      | 0.000          |
| <b>Shapiro-Wilk</b>       |               | <b>Statistic</b>           | <b>P-value</b> |
|                           |               | 0.644                      | 0.000          |

|  |  |                 |                              |                               |              |
|--|--|-----------------|------------------------------|-------------------------------|--------------|
|  |  | <b>Unlikely</b> | <b>Likely after 10 years</b> | <b>Likely before 10 years</b> | <b>Total</b> |
|--|--|-----------------|------------------------------|-------------------------------|--------------|

|                       |                               |       |        |        |         |
|-----------------------|-------------------------------|-------|--------|--------|---------|
| <b>Some knowledge</b> | <b>Number of observations</b> | 12    | 85     | 171    | 268     |
|                       | <b>Frequency</b>              | 4.48% | 31.72% | 63.81% | 100.00% |
| <b>Good knowledge</b> | <b>Number of observations</b> | 20    | 121    | 274    | 415     |
|                       | <b>Frequency</b>              | 4.82% | 29.16% | 66.02% | 100.00% |
| <b>High Knowledge</b> | <b>Number of observations</b> | 7     | 65     | 179    | 251     |
|                       | <b>Frequency</b>              | 2.79% | 25.90% | 71.31% | 100.00% |

Please rank the following applications of artificial intelligence in cancer care from most likely to least likely to be successful in the next 10 years (5 point scale. where 1 is the most likely and 5 is the least likely)

|                               | <b>Most Likely (1)</b> | <b>2</b> | <b>3</b> | <b>4</b> | <b>Least likely (5)</b> |
|-------------------------------|------------------------|----------|----------|----------|-------------------------|
| <b>Cancer drug discovery</b>  | 16.27%                 | 12.17%   | 22.61%   | 19.75%   | 29.19%                  |
| <b>Early cancer detection</b> | 38.02%                 | 28.61%   | 15.31%   | 9.03%    | 9.03%                   |
| <b>Cancer diagnostics</b>     | 32.68%                 | 36.35%   | 15.30%   | 9.06%    | 6.61%                   |
| <b>Therapy administration</b> | 5.76%                  | 12.48%   | 21.97%   | 36.01%   | 23.77%                  |
| <b>Follow-up strategies</b>   | 9.60%                  | 13.11%   | 27.91%   | 22.94%   | 26.44%                  |

|                       |                  | <b>Cancer drug discovery</b> | <b>Early cancer detection</b> | <b>Cancer diagnostics</b> | <b>Therapy administration</b> | <b>Follow-up strategies</b> |
|-----------------------|------------------|------------------------------|-------------------------------|---------------------------|-------------------------------|-----------------------------|
| <b>Kruskal-Wallis</b> | <b>Statistic</b> | 0.765                        | 1.402                         | 1.353                     | 0.634                         | 0.211                       |
|                       | <b>P-value</b>   | 0.682                        | 0.496                         | 0.508                     | 0.728                         | 0.900                       |

| <b>Cancer drug discovery</b> |                               |          |          |          |          |          |              |
|------------------------------|-------------------------------|----------|----------|----------|----------|----------|--------------|
|                              |                               | <b>1</b> | <b>2</b> | <b>3</b> | <b>4</b> | <b>5</b> | <b>Total</b> |
| <b>Some knowledge</b>        | <b>Number of observations</b> | 41       | 26       | 53       | 42       | 76       | 238          |
|                              | <b>Frequency</b>              | 17.23%   | 10.92%   | 22.27%   | 17.65%   | 31.93%   | 100.00%      |
| <b>Good knowledge</b>        | <b>Number of observations</b> | 56       | 45       | 72       | 65       | 106      | 344          |
|                              | <b>Frequency</b>              | 16.28%   | 13.08%   | 20.93%   | 18.90%   | 30.81%   | 100.00%      |
| <b>High Knowledge</b>        | <b>Number of observations</b> | 34       | 27       | 57       | 52       | 53       | 223          |

|  |                  |        |        |        |        |        |         |
|--|------------------|--------|--------|--------|--------|--------|---------|
|  | <b>Frequency</b> | 15.25% | 12.11% | 25.56% | 23.32% | 23.77% | 100.00% |
|--|------------------|--------|--------|--------|--------|--------|---------|

| <b>Early cancer detection</b> |                               |          |          |          |          |          |              |
|-------------------------------|-------------------------------|----------|----------|----------|----------|----------|--------------|
|                               |                               | <b>1</b> | <b>2</b> | <b>3</b> | <b>4</b> | <b>5</b> | <b>Total</b> |
| <b>Some knowledge</b>         | <b>Number of observations</b> | 86       | 62       | 36       | 33       | 19       | 236          |
|                               | <b>Frequency</b>              | 36.44%   | 26.27%   | 15.25%   | 13.98%   | 8.05%    | 100.00%      |
| <b>Good knowledge</b>         | <b>Number of observations</b> | 130      | 99       | 61       | 24       | 27       | 341          |
|                               | <b>Frequency</b>              | 38.12%   | 29.03%   | 17.89%   | 7.04%    | 7.92%    | 100.00%      |
| <b>High Knowledge</b>         | <b>Number of observations</b> | 87       | 67       | 25       | 15       | 26       | 220          |
|                               | <b>Frequency</b>              | 39.55%   | 30.45%   | 11.36%   | 6.82%    | 11.82%   | 100.00%      |

| <b>Cancer diagnostics</b> |                               |          |          |          |          |          |              |
|---------------------------|-------------------------------|----------|----------|----------|----------|----------|--------------|
|                           |                               | <b>1</b> | <b>2</b> | <b>3</b> | <b>4</b> | <b>5</b> | <b>Total</b> |
| <b>Some knowledge</b>     | <b>Number of observations</b> | 76       | 85       | 37       | 22       | 18       | 238          |
|                           | <b>Frequency</b>              | 31.93%   | 35.71%   | 15.55%   | 9.24%    | 7.56%    | 100.00%      |
| <b>Good knowledge</b>     | <b>Number of observations</b> | 124      | 125      | 62       | 24       | 22       | 357          |
|                           | <b>Frequency</b>              | 34.73%   | 35.01%   | 17.37%   | 6.72%    | 6.16%    | 100.00%      |
| <b>High Knowledge</b>     | <b>Number of observations</b> | 67       | 87       | 26       | 28       | 14       | 222          |
|                           | <b>Frequency</b>              | 30.18%   | 39.19%   | 11.71%   | 12.61%   | 6.31%    | 100.00%      |

| <b>Therapy administration</b> |                               |          |          |          |          |          |              |
|-------------------------------|-------------------------------|----------|----------|----------|----------|----------|--------------|
|                               |                               | <b>1</b> | <b>2</b> | <b>3</b> | <b>4</b> | <b>5</b> | <b>Total</b> |
| <b>Some knowledge</b>         | <b>Number of observations</b> | 14       | 34       | 54       | 80       | 58       | 240          |
|                               | <b>Frequency</b>              | 5.83%    | 14.17%   | 22.50%   | 33.33%   | 24.17%   | 100.00%      |
| <b>Good knowledge</b>         | <b>Number of observations</b> | 124      | 125      | 62       | 24       | 22       | 357          |
|                               | <b>Frequency</b>              | 34.73%   | 35.01%   | 17.37%   | 6.72%    | 6.16%    | 100.00%      |
| <b>High Knowledge</b>         | <b>Number of observations</b> | 16       | 22       | 51       | 76       | 60       | 225          |
|                               | <b>Frequency</b>              | 7.11%    | 9.78%    | 22.67%   | 33.78%   | 26.67%   | 100.00%      |

| <b>Follow-up strategies</b> |                               |          |          |          |          |          |              |
|-----------------------------|-------------------------------|----------|----------|----------|----------|----------|--------------|
|                             |                               | <b>1</b> | <b>2</b> | <b>3</b> | <b>4</b> | <b>5</b> | <b>Total</b> |
| <b>Some knowledge</b>       | <b>Number of observations</b> | 22       | 37       | 71       | 59       | 64       | 253          |
|                             | <b>Frequency</b>              | 8.70%    | 14.62%   | 28.06%   | 23.32%   | 25.30%   | 100.00%      |

|                       |                               |        |        |        |        |        |         |
|-----------------------|-------------------------------|--------|--------|--------|--------|--------|---------|
| <b>Good knowledge</b> | <b>Number of observations</b> | 36     | 52     | 106    | 93     | 105    | 392     |
|                       | <b>Frequency</b>              | 9.18%  | 13.27% | 27.04% | 23.72% | 26.79% | 100.00% |
| <b>High Knowledge</b> | <b>Number of observations</b> | 27     | 27     | 70     | 51     | 65     | 240     |
|                       | <b>Frequency</b>              | 11.25% | 11.25% | 29.17% | 21.25% | 27.08% | 100.00% |

**Considering the recent FDA approval of artificial intelligence applications in cancer care and their future prospects, in your opinion which specific area of interest will benefit the most in the next 10 years?**

|                    |   |                        |         |
|--------------------|---|------------------------|---------|
| Sample size        |   | 892                    |         |
| Margin of error    |   | 3.29%                  |         |
| Mean               |   | 3.460                  |         |
| Standard deviation |   | 2.167                  |         |
| Percentiles        | ¼ | 1 (Pathology)          |         |
|                    | ½ | 3 (Radiation Oncology) |         |
|                    | ¾ | 6 (Cancer radiology)   |         |
| Kruskal-Wallis     |   | Statistic              | P-value |
|                    |   | 4.034                  | 0.133   |
| Kolmogorov-Smirnov |   | Statistic              | P-value |
|                    |   | 0.252                  | 0.000   |
| Shapiro-Wilk       |   | Statistic              | P-value |
|                    |   | 0.802                  | 0.000   |

|                           | <b>Some knowledge</b>         |                  | <b>Good knowledge</b>         |                  | <b>High Knowledge</b>         |                  |
|---------------------------|-------------------------------|------------------|-------------------------------|------------------|-------------------------------|------------------|
|                           | <b>Number of observations</b> | <b>Frequency</b> | <b>Number of observations</b> | <b>Frequency</b> | <b>Number of observations</b> | <b>Frequency</b> |
| <b>Cancer radiology</b>   | 84                            | 33.07%           | 149                           | 37.44%           | 76                            | 31.67%           |
| <b>Clinical Oncology</b>  | 58                            | 22.83%           | 83                            | 20.85%           | 40                            | 16.67%           |
| <b>Gastroenterology</b>   | 8                             | 3.15%            | 13                            | 3.27%            | 7                             | 2.92%            |
| <b>Gynecology</b>         | 4                             | 1.57%            | 7                             | 1.76%            | 2                             | 0.83%            |
| <b>Pathology</b>          | 66                            | 25.98%           | 96                            | 24.12%           | 79                            | 32.92%           |
| <b>Radiation Oncology</b> | 25                            | 9.84%            | 41                            | 10.30%           | 31                            | 12.92%           |
| <b>Other</b>              | 9                             | 3.54%            | 9                             | 2.26%            | 5                             | 2.08%            |
| <b>Total</b>              | 254                           | 100.00%          | 398                           | 100.00%          | 240                           | 100.00%          |

**Considering the following options, which one you believe is the most likely to hamper the use of artificial intelligence in cancer care?**

|                    |     |
|--------------------|-----|
| <b>Sample size</b> | 894 |
|--------------------|-----|

|                    |   |                                                           |         |
|--------------------|---|-----------------------------------------------------------|---------|
| Margin of error    |   | 3.28%                                                     |         |
| Mean               |   | 3.275                                                     |         |
| Standard deviation |   | 1.829                                                     |         |
| Percentiles        | ¼ | 1 (Difficulty of incorporation into clinical practice)    |         |
|                    | ½ | 4 (Lack of improvement in medical applications)           |         |
|                    | ¾ | 5 (Lack of standardization in cancer-related health data) |         |
| Kruskal-Wallis     |   | Statistic                                                 | P-value |
|                    |   | 0.607                                                     | 0.738   |
| Kolmogorov-Smirnov |   | Statistic                                                 | P-value |
|                    |   | 0.294                                                     | 0.000   |
| Shapiro-Wilk       |   | Statistic                                                 | P-value |
|                    |   | 0.784                                                     | 0.000   |

|                                                              | <b>Some knowledge</b>         |                  | <b>Good knowledge</b>         |                  | <b>High Knowledge</b>         |                  |
|--------------------------------------------------------------|-------------------------------|------------------|-------------------------------|------------------|-------------------------------|------------------|
|                                                              | <b>Number of observations</b> | <b>Frequency</b> | <b>Number of observations</b> | <b>Frequency</b> | <b>Number of observations</b> | <b>Frequency</b> |
| <b>Difficulty of incorporation into clinical practice</b>    | 64                            | 25.10%           | 106                           | 26.57%           | 63                            | 26.25%           |
| <b>Ethical or regulatory issues</b>                          | 50                            | 19.61%           | 93                            | 23.31%           | 61                            | 25.42%           |
| <b>Lack of improvement in medical applications</b>           | 14                            | 5.49%            | 15                            | 3.76%            | 11                            | 4.58%            |
| <b>Lack of standardization in cancer-related health data</b> | 120                           | 47.06%           | 165                           | 41.35%           | 90                            | 37.50%           |
| <b>Other</b>                                                 | 7                             | 2.75%            | 20                            | 5.01%            | 15                            | 6.25%            |
| <b>Total</b>                                                 | 255                           | 100.00%          | 399                           | 100.00%          | 240                           | 100.00%          |

**Why do you believe artificial intelligence use in cancer care is likely to be hampered by the difficulty of incorporating it into clinical practice?**

|                    |   |                                                                                       |         |
|--------------------|---|---------------------------------------------------------------------------------------|---------|
| Sample size        |   | 233                                                                                   |         |
| Margin of error    |   | 6.52%                                                                                 |         |
| Mean               |   | 2.425                                                                                 |         |
| Standard deviation |   | 0.863                                                                                 |         |
| Percentiles        | ¼ | 2 (Ignorance of the variables responsible for the artificial intelligence's decision) |         |
|                    | ½ | 3 (Aligning artificial intelligence to the specific context of clinical practice)     |         |
|                    | ¾ | 3 (Aligning artificial intelligence to the specific context of clinical practice)     |         |
| Kruskal-Wallis     |   | Statistic                                                                             | P-value |
|                    |   | 0.659                                                                                 | 0.719   |
| Kolmogorov-Smirnov |   | Statistic                                                                             | P-value |
|                    |   | 0.284                                                                                 | 0.000   |
| Shapiro-Wilk       |   | Statistic                                                                             | P-value |
|                    |   | 0.845                                                                                 | 0.000   |



|                                                                                   | Some knowledge         |           | Good knowledge         |           | High Knowledge         |           |
|-----------------------------------------------------------------------------------|------------------------|-----------|------------------------|-----------|------------------------|-----------|
|                                                                                   | Number of observations | Frequency | Number of observations | Frequency | Number of observations | Frequency |
| Aligning artificial intelligence to the specific context of clinical practice     | 30                     | 46.88%    | 52                     | 49.06%    | 27                     | 42.86%    |
| Conflicts between artificial intelligence and other clinical strategies           | 14                     | 21.88%    | 17                     | 16.04%    | 11                     | 17.46%    |
| Ignorance of the variables responsible for the artificial intelligence's decision | 17                     | 26.56%    | 31                     | 29.25%    | 18                     | 28.57%    |
| Other                                                                             | 3                      | 4.69%     | 6                      | 5.66%     | 7                      | 11.11%    |
| Total                                                                             | 64                     | 100.00%   | 106                    | 100.00%   | 63                     | 100.00%   |

**Why do you believe artificial intelligence use in cancer care is likely to be hampered by ethical or regulatory issues?**

|                                 |   |                                                                                                   |         |
|---------------------------------|---|---------------------------------------------------------------------------------------------------|---------|
| by Council of Regulatory Issues |   |                                                                                                   |         |
| Sample size                     |   | 204                                                                                               |         |
| Margin of error                 |   | 6.97%                                                                                             |         |
| Mean                            |   | 1.554                                                                                             |         |
| Standard deviation              |   | 0.900                                                                                             |         |
| Percentiles                     | ¼ | 1 (Uncertainty about legal responsibility and accountability for AI-supported clinical decisions) |         |
|                                 | ½ | 1 (Uncertainty about legal responsibility and accountability for AI-supported clinical decisions) |         |
|                                 | ¾ | 2 (Algorithmic bias caused by the underrepresentation of minorities and underrated groups)        |         |
| Kruskal-Wallis                  |   | Statistic                                                                                         | P-value |
|                                 |   | 3.280                                                                                             | 0.194   |
| Kolmogorov-Smirnov              |   | Statistic                                                                                         | P-value |
|                                 |   | 0.398                                                                                             | 0.000   |
| Shapiro-Wilk                    |   | Statistic                                                                                         | P-value |
|                                 |   | 0.654                                                                                             | 0.000   |

|                                                                                               | Some knowledge         |           | Good knowledge         |           | High Knowledge         |           |
|-----------------------------------------------------------------------------------------------|------------------------|-----------|------------------------|-----------|------------------------|-----------|
|                                                                                               | Number of observations | Frequency | Number of observations | Frequency | Number of observations | Frequency |
| Algorithmic bias caused by the underrepresentation of minorities and underrated groups        | 7                      | 14.00%    | 22                     | 23.66%    | 6                      | 9.84%     |
| Problems with financing, remuneration, reimbursement mechanisms and insurance models          | 4                      | 8.00%     | 11                     | 11.83%    | 6                      | 9.84%     |
| Uncertainty about legal responsibility and accountability for AI-supported clinical decisions | 37                     | 74.00%    | 55                     | 59.14%    | 44                     | 72.13%    |
| Other                                                                                         | 2                      | 4.00%     | 5                      | 5.38%     | 5                      | 8.20%     |
| Total                                                                                         | 50                     | 100.00%   | 93                     | 100.00%   | 61                     | 100.00%   |

**Why do you believe artificial intelligence use in cancer care is likely to be hampered by a lack of improvement in medical applications?**

|                    |   |                                                                      |           |         |
|--------------------|---|----------------------------------------------------------------------|-----------|---------|
| Sample size        |   |                                                                      | 38        |         |
| Margin of error    |   |                                                                      | 16.21%    |         |
| Mean               |   |                                                                      | 2.132     |         |
| Standard deviation |   |                                                                      | 0.875     |         |
| Percentiles        | ¼ | 2 (Unsuitability to a real-world context of care and services)       |           |         |
|                    | ½ | 2 (Unsuitability to a real-world context of care and services)       |           |         |
|                    | ¾ | 3 (Unrealistic expectations in patients regarding clinical outcomes) |           |         |
| Kruskal-Wallis     |   |                                                                      | Statistic | P-value |
|                    |   |                                                                      | 0.106     | 0.948   |
| Kolmogorov-Smirnov |   |                                                                      | Statistic | P-value |
|                    |   |                                                                      | 0.270     | 0.000   |
| Shapiro-Wilk       |   |                                                                      | Statistic | P-value |
|                    |   |                                                                      | 0.857     | 0.000   |

|  |                |                |                |
|--|----------------|----------------|----------------|
|  | Some knowledge | Good knowledge | High Knowledge |
|--|----------------|----------------|----------------|

|                                                                          | Number of observations | Frequency | Number of observations | Frequency | Number of observations | Frequency |
|--------------------------------------------------------------------------|------------------------|-----------|------------------------|-----------|------------------------|-----------|
| <b>The intersection between multiple diagnoses or clinical practices</b> | 3                      | 21.43%    | 2                      | 15.38%    | 4                      | 36.36%    |
| <b>Unrealistic expectations in patients regarding clinical outcomes</b>  | 2                      | 14.29%    | 2                      | 15.38%    | 4                      | 36.36%    |
| <b>Unsuitability to a real-world context of care and services</b>        | 8                      | 57.14%    | 8                      | 61.54%    | 2                      | 18.18%    |
| <b>Other</b>                                                             | 1                      | 7.14%     | 1                      | 7.69%     | 1                      | 9.09%     |
| <b>Total</b>                                                             | 14                     | 100.00%   | 13                     | 100.00%   | 11                     | 100.00%   |

**Why do you believe artificial intelligence use in cancer care is likely to be hampered by the lack of standardization of cancer-related health data?**

|                                                               |   |                                                                                      |         |
|---------------------------------------------------------------|---|--------------------------------------------------------------------------------------|---------|
| by the lack of standardization of cancer-related health data. |   |                                                                                      |         |
| Sample size                                                   |   | 375                                                                                  |         |
| Margin of error                                               |   | 5.13%                                                                                |         |
| Mean                                                          |   | 2.187                                                                                |         |
| Standard deviation                                            |   | 0.966                                                                                |         |
| Percentiles                                                   | ¼ | 1 (Difficulties to access and share patient’s data)                                  |         |
|                                                               | ½ | 3 (Difficulties to test, validate, certificate, and audit AI algorithms and systems) |         |
|                                                               | ¾ | 3 (Difficulties to test, validate, certificate, and audit AI algorithms and systems) |         |
| Kruskal-Wallis                                                |   | Statistic                                                                            | P-value |
|                                                               |   | 1.936                                                                                | 0.380   |
| Kolmogorov-Smirnov                                            |   | Statistic                                                                            | P-value |
|                                                               |   | 0.307                                                                                | 0.000   |
| Shapiro-Wilk                                                  |   | Statistic                                                                            | P-value |
|                                                               |   | 0.772                                                                                | 0.000   |

|                                                        | <b>Some knowledge</b>  |           | <b>Good knowledge</b>  |           | <b>High Knowledge</b>  |           |
|--------------------------------------------------------|------------------------|-----------|------------------------|-----------|------------------------|-----------|
|                                                        | Number of observations | Frequency | Number of observations | Frequency | Number of observations | Frequency |
| <b>Difficulties to access and share patient's data</b> | 35                     | 26.92%    | 69                     | 40.35%    | 36                     | 37.50%    |

|                                                                                         |     |         |     |         |    |         |
|-----------------------------------------------------------------------------------------|-----|---------|-----|---------|----|---------|
| <b>Difficulties to test, validate, certificate, and audit AI algorithms and systems</b> | 69  | 53.08%  | 76  | 44.44%  | 44 | 45.83%  |
| <b>Lack or misuse of electronic health records</b>                                      | 23  | 17.69%  | 18  | 10.53%  | 13 | 13.54%  |
| <b>Other</b>                                                                            | 3   | 2.31%   | 8   | 4.68%   | 3  | 3.13%   |
| <b>Total</b>                                                                            | 130 | 100.00% | 171 | 100.00% | 96 | 100.00% |
